# Supplementary material for: Impact of different food label formats on healthiness evaluation and food choice of consumers: a randomized-controlled study
Source: PubMed Central journal article supplement (PMC2702386; doi:10.1186/1471-2458-9-184), 2009-06-12
Supplement: 1471-2458-9-184-S3.pdf [file 1471-2458-9-184-S3.pdf]

Additional file 3:

Total envisaged daily consumption compared with the results of the German National Nutrition Survey II (NVS II)<sup>1</sup> (Max Rubner-Institut. Bundesforschungsinstitut für Ernährung und Lebensmittel, 2008)

| Energy/ nutrient | Gender | Unit | Food Labelling study (total) |        | NVS II |        |
|------------------|--------|------|------------------------------|--------|--------|--------|
|                  |        |      | Mean ± SD                    | Median | Mean   | Median |
| Energy           | male   | kcal | 2945.0 ± 1199.0              | 2759   | 2571   | 2413   |
|                  | female | kcal | 2039.3 ± 778.3               | 1900   | 1915   | 1833   |
| fat              | male   | g    | 129.2 ± 73.9                 | 113.3  | 102.0  | 92.5   |
|                  |        | %    | 38.0 ± 9.6                   | 38.8   | 35.8   | 35.8   |
|                  | female | g    | 79.3 ± 43.5                  | 71.8   | 73.8   | 68.4   |
|                  |        | %    | 33.7 ± 8.8                   | 34.1   | 34.8   | 34.7   |
| sodium           | male   | g    | 5.7 ± 3.2                    | 4.7    | 3.5    | 3.2    |
|                  | female | g    | 3.5 ± 1.6                    | 3.3    | 2.5    | 2.4    |
| protein          | male   | g    | 114.6 ± 51.7                 | 99.7   | 90.8   | 85.2   |
|                  | female | g    | 77.2 ± 31.0                  | 70.4   | 66.7   | 64.3   |
| carbohydrates    | male   | g    | 320.5 ± 123.4                | 307.1  | 289.2  | 270.2  |
|                  |        | %    | 44.7 ± 9.7                   | 44.6   | 45.5   | 45.3   |
|                  | female | g    | 246.7 ± 89.9                 | 238.2  | 231.0  | 220.2  |
|                  |        | %    | 49.3 ± 9.0                   | 48.5   | 48.9   | 48.9   |

<sup>1</sup> only parameters available in the published report from NVS II are presented
